# Supplementary material for: LIMD2 Is a Prognostic and Predictive Marker in Patients With Esophageal Cancer Based on a Cerna Network Analysis
Source: Research Square preprint supplement (doi:10.21203/rs.3.rs-568786/v1), 2021-06-07
Supplement: Supplementary file 1 [file 511d9540f349189d382a1a76.docx]

**Supplementary Methods**

*RNA sequencing*

Six pairs of samples were used for RNA-sequencing. First, we characterized circRNA transcripts by sequencing analysis of ribosomal RNA and linear RNA. The total RNA was extracted by the Trizol method. Then, every sample was sequenced on Illumina HiSeq yielding an average of 42.38 million reads, which were mapped to the human reference genome (GRCh38/hg38) by TopHat2 (v2.1.1). The CIRC explorer program (v2.2.3) was used with the fusion junctions obtained from TopHat2 to identify both the circularizing junction and the spliced sequence of circRNAs. The whole step of library construction and sequencing was performed at Shanghai Life genes Technology Co. Ltd.

*qRT-PCR validation for the expression of LIMD2*

Quantitative reverse transcription-polymerase chain reaction (qRT-PCR) was applied to verify the expression of the target *LIMD2* in 20 pairs of ECA and adjacent normal esophageal tissues. The primers of *LIMD2* were purchased from BioSune (Shanghai, China) (Table S2). An RTⅢ All-in-One Mix with dsDNase (Monad Biotech Co. Ltd., Shanghai, China) was used to synthesize cDNA from 1 µg of total RNA. The qRT-PCR analyses were conducted on the Quant Studio 6 Flex qRT-PCR system (Applied Biosystems, Thermo Fisher Scientific Co. Ltd., US) using the Hieff ®qPCR SYBR® Green Master Mix, Low Rox (Yeasen, Biotechnology Co., Ltd, Shanghai, China). The reaction was: 95°C for 10 min, then 40 cycles of 95ºC for 15 s and 60ºC for 1 min. The reference gene was *GAPDH*, and the relative gene expression levels were calculated using the 2−ΔΔCt method.

**Supplementary Figures**

**
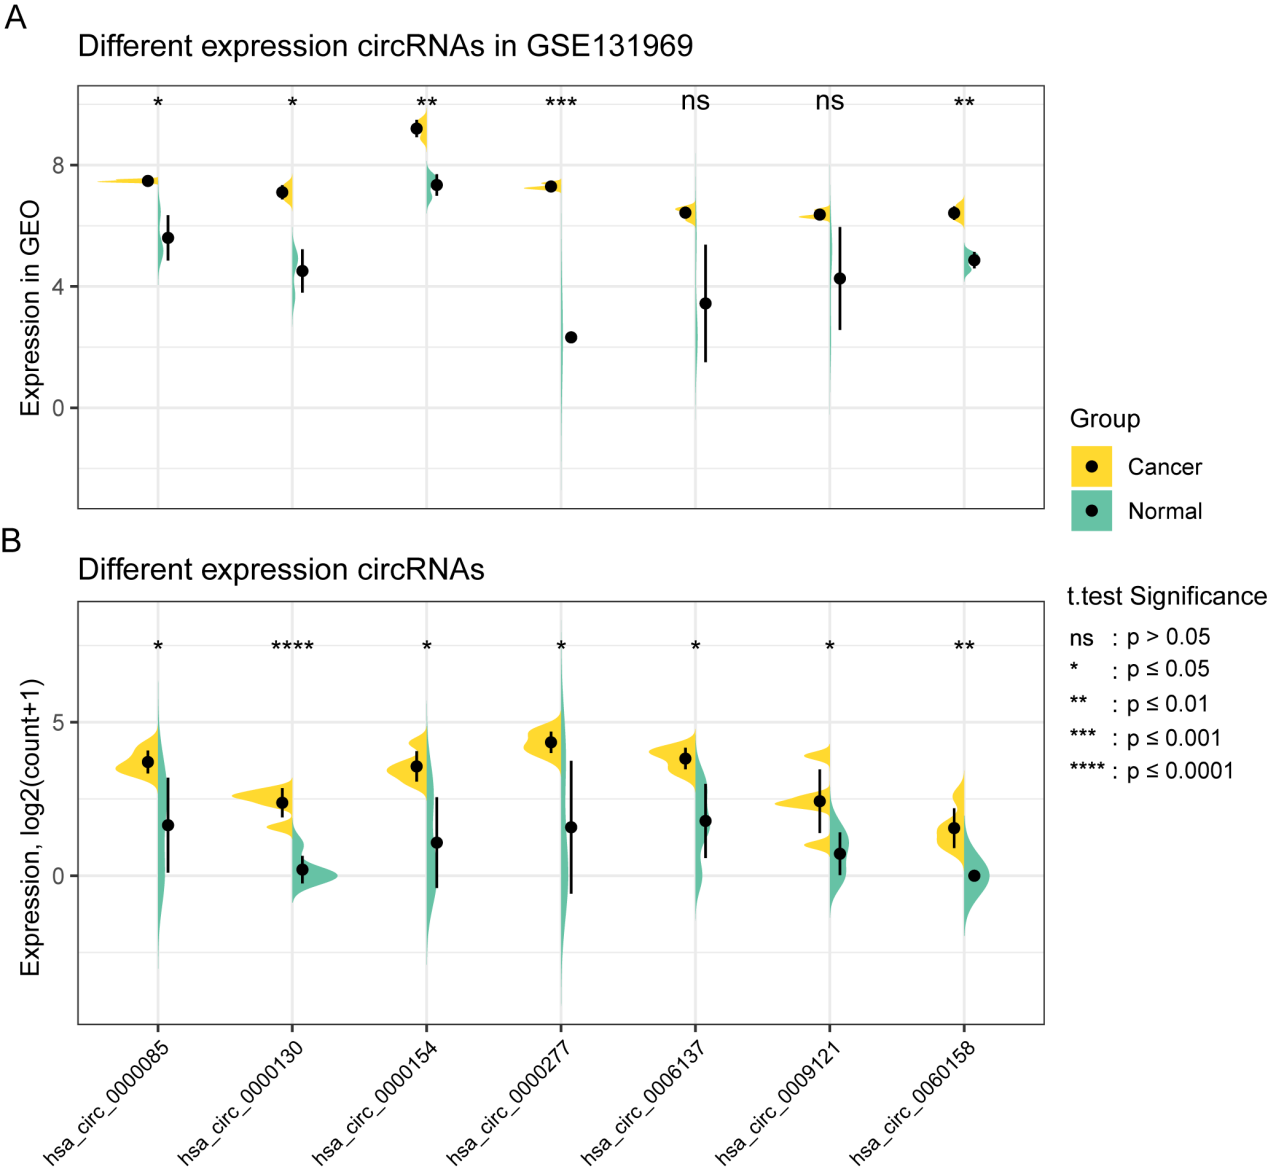
**

**Figure S1. Expressions of seven differentially expressed circRNAs in GSE131969 and our RNA-seq data, respectively.** **(A, B)** Differentially expressed circRNAs between ECA and the adjacent normal tissues in GSE131969 and the present RNA-seq data.


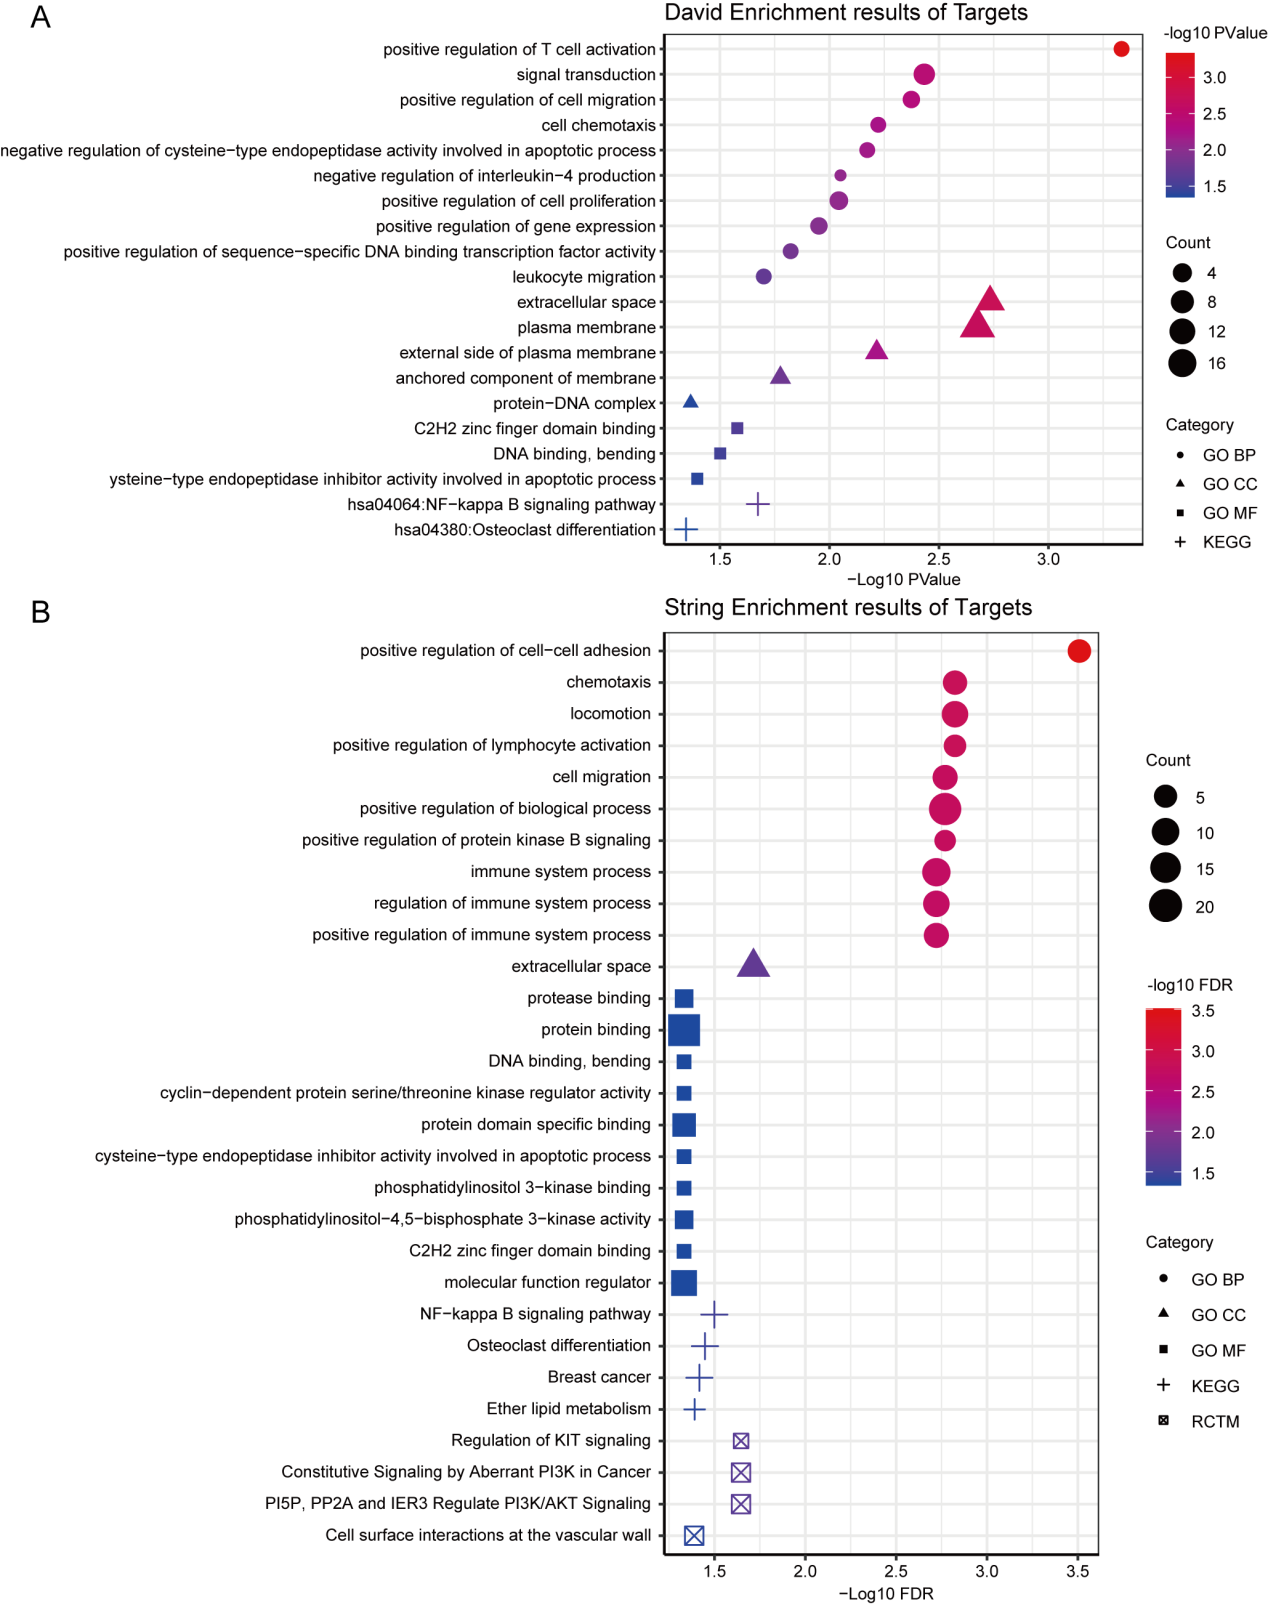


**Figure S2.** **Functional annotation of target mRNAs. (A)** Functional enrichment of targets using the David database; **(B)** functional enrichment of targets using the String database.


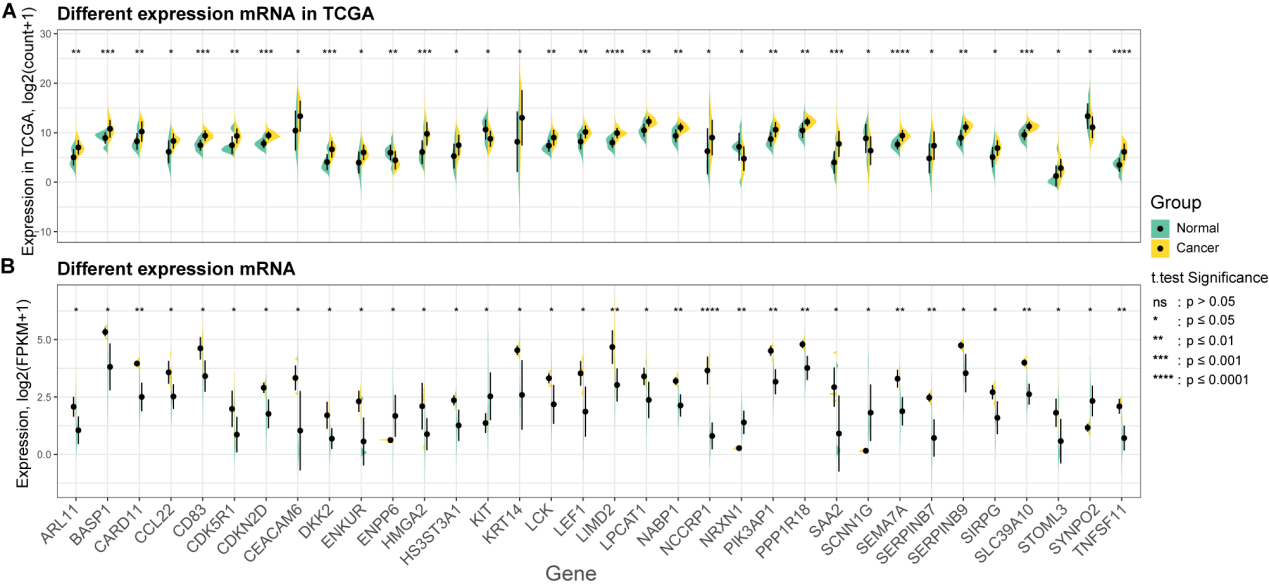


**Figure S3.** **Differential expression of target mRNAs in the TCGA database and our RNA-Seq data.** **(A)** Differential expression of mRNAs in the TCGA database; **(B)** differential expression of mRNAs in our RNA-Seq data.


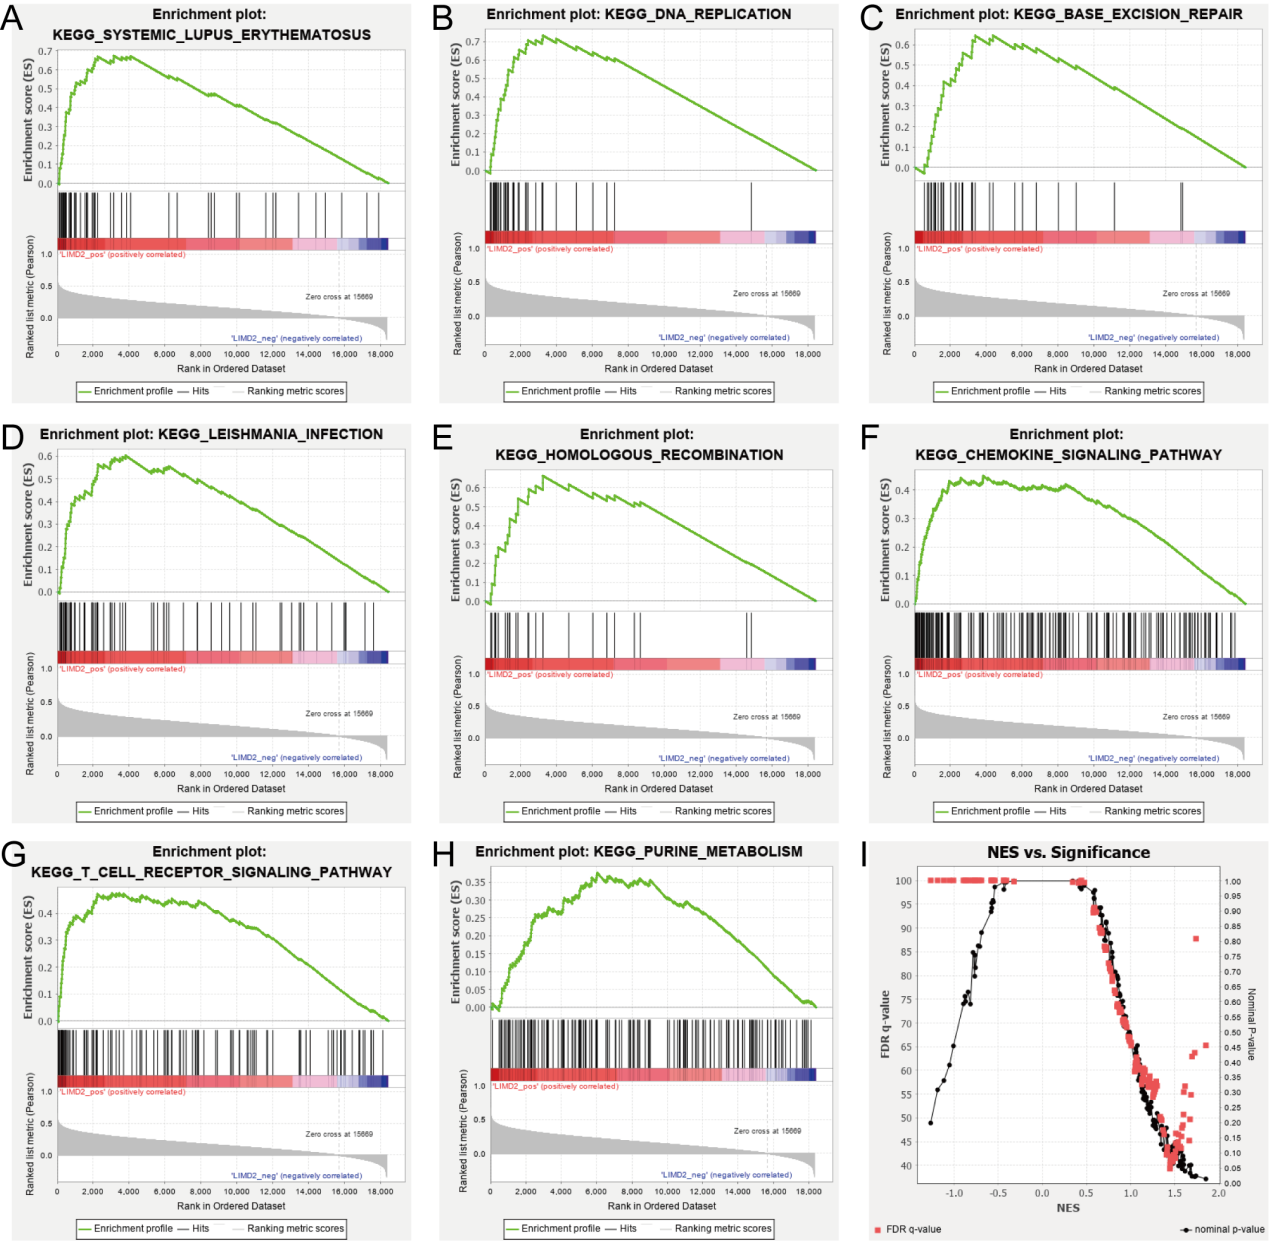


**Figure S4.** **Gene set enrichment analysis (GSEA) of key target mRNAs in ECA.** **(A-H)** Gene set enrichment analysis revealed that systemic lupus erythematosus **(A)**, DNA replication **(B)**, base excision repair **(C)**, leishmania infection **(D)**, homologous recombination **(E)**, chemokine signaling pathway **(F)**, T cell receptor signaling pathway **(G)**, and purine metabolism **(H)** were enriched in ECA. **(I)** Normalized enrichment score (NES) and corresponding significance. *P* < 0.05.


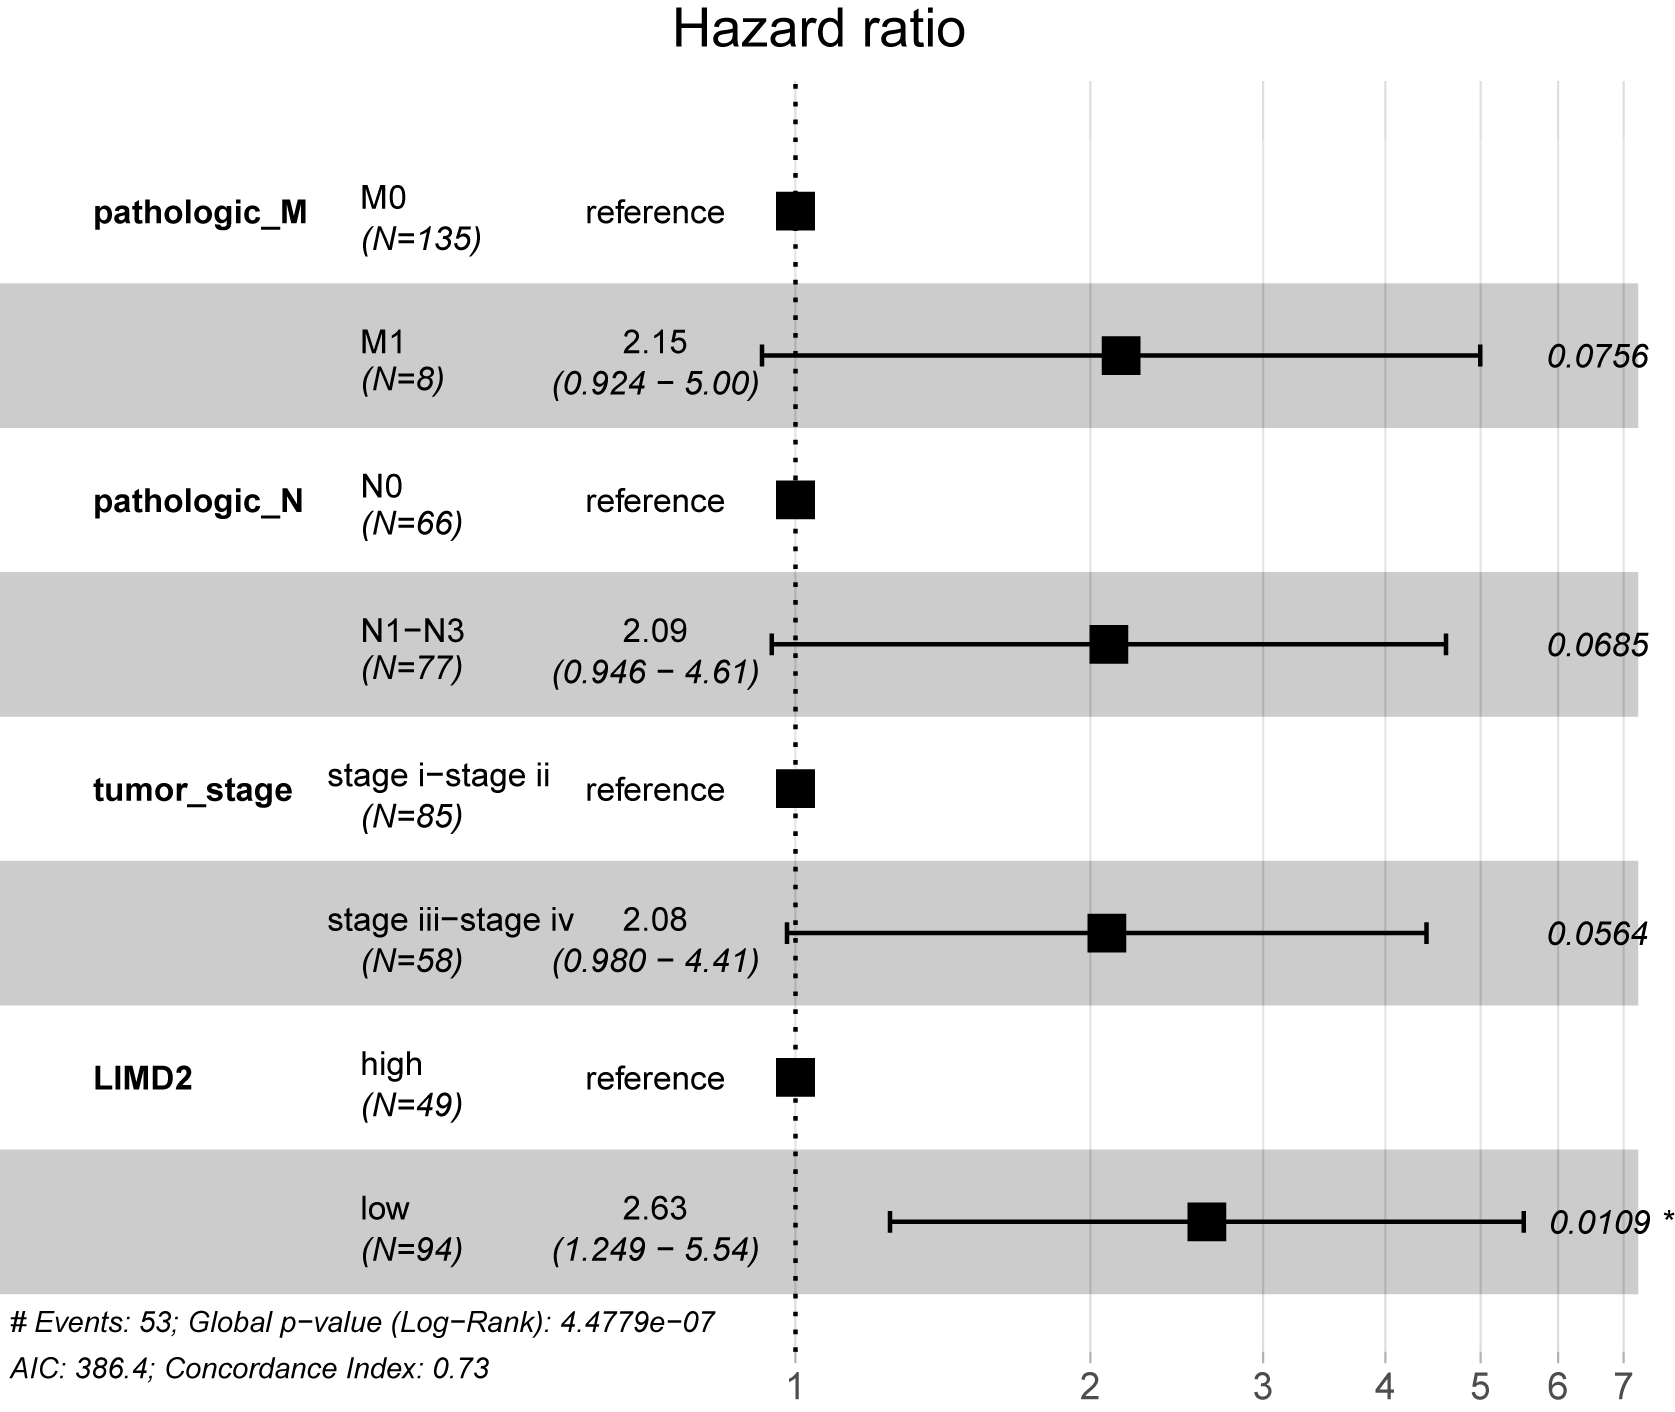


**Figure S5.** **Relation between *LIMD2* expression in ECA and clinical variables based on TCGA cohort.** Cox regression analysis was performed to identify factors associated with *LIMD2* in ECA patients.
